# Supplementary material
Source: PubMed Central journal article supplement (PMC3412426)
Supplement: NIHMS395023-supplement-supplement_1.pdf [file NIHMS395023-supplement-supplement_1.pdf]

## **SUPPLEMENTAL MATERIAL**

### **Magnetic resonance imaging using ferumoxytol improves the visualization of central nervous system vascular malformations**

Edit Dósa, MD, PhD<sup>1</sup>, Suchita Tuladhar, MD<sup>1</sup>, Leslie L. Muldoon, PhD<sup>1</sup>, Bronwyn E. Hamilton, MD<sup>2</sup>, William D. Rooney, PhD<sup>4</sup>, Edward A. Neuwelt, MD<sup>1,3,5</sup>

Departments of <sup>1</sup>Neurology, <sup>2</sup>Radiology, <sup>3</sup>Neurosurgery, <sup>4</sup>Advanced Imaging Research Center, Oregon Health and Science University, <sup>5</sup>Portland Veterans Affairs Medical Center, Portland, Oregon, USA

#### **Corresponding author:**

Edward A. Neuwelt, MD

Oregon Health and Science University

3181 S.W. Sam Jackson Park Road, L603

Portland, Oregon 97239-3098

Phone: (503) 494-5626

Fax: (503) 494-5627

Email: [neuwelte@ohsu.edu](mailto:neuwelte@ohsu.edu)

## Supplemental Methods

### *Brain MRI Acquisition Parameters*

Siemens: 1) Axial 2D T<sub>1</sub>-weighted SE [repetition time (TR), 900 ms; echo time (TE), 10 ms; field of view (FOV), 180 x 240 mm<sup>2</sup>; acquisition matrix, 192 x 256; number of slices, 44; slice thickness, 2 mm; interslice gap, 0 mm]. 2) Axial 2D T<sub>2</sub>-weighted turbo spin echo (TSE) (TR, 9000 ms; TE, 93 ms; turbo factor, 9; FOV, 180 x 240 mm<sup>2</sup>; acquisition matrix, 192 x 256; number of slices, 49; slice thickness, 2 mm; interslice gap, 0 mm). 3) Axial 3D T<sub>2</sub>\*-weighted GRE [TR, 28 ms; TE, 20 ms; flip angle (FA), 15°; FOV, 187.5 x 240 mm<sup>2</sup>; acquisition matrix, 298 x 448; number of slices, 72; slice thickness, 1.2 mm; interslice gap, 0 mm].

Philips: 1) Axial 2D T<sub>1</sub>-weighted SE (TR, 900 ms; TE, 9.5 ms; FOV, 240 x 240 mm<sup>2</sup>; acquisition matrix, 212 x 268; number of slices, 44; slice thickness, 2 mm; interslice gap, 0 mm). 2) Axial 2D T<sub>2</sub>-weighted TSE (TR, 4500 ms; TE, 93 ms; turbo factor, 14; FOV, 240 x 240 mm<sup>2</sup>; acquisition matrix, 209 x 268; number of slices, 44; slice thickness, 2 mm; interslice gap, 0 mm). 3) Axial 3D T<sub>2</sub>\*-weighted fast field echo (TR, 31 ms; TE, 41 ms; FA, 15°; FOV, 240 x 240 mm<sup>2</sup>; acquisition matrix, 284 x 400; number of slices, 72; slice thickness, 1.2 mm; interslice gap, 0 mm).

The slices were positioned parallel to the long axis of the corpus callosum.

### *Spine MRI Acquisition Parameters*

Siemens: 1) Sagittal 2D T<sub>1</sub>-weighted TSE (TR, 700 ms; TE, 10 ms; turbo factor, 5; FOV, 362.5 x 400 mm<sup>2</sup>; matrix size, 278 x 384; number of slices, 15; slice thickness, 3 mm; interslice gap, 0.3 mm). 2) Sagittal 2D T<sub>2</sub>-weighted TSE (TR, 3600 ms; TE, 106 ms; turbo factor, 31; FOV, 400 x 400 mm<sup>2</sup>; matrix size, 307 x 384; number of slices, 15; slice thickness, 3 mm; interslice gap, 0.3 mm). 3) Sagittal 2D T<sub>2</sub>-weighted GRE (TR, 179 ms; TE, 5.7 ms; FA, 25°; FOV, 400 x 400 mm<sup>2</sup>; matrix size, 240 x 334; number of slices, 15; slice thickness, 3 mm; interslice gap, 0.3 mm). 4) Axial 2D T<sub>1</sub>-weighted SE (TR, 900 ms; TE, 10 ms; FOV, 180 x 240 mm<sup>2</sup>; matrix size, 192 x 256; number of slices, 44; slice thickness, 2 mm; interslice gap, 0 mm). 5) Axial 2D T<sub>2</sub>-weighted TSE (TR, 9000 ms; TE, 93 ms; turbo factor, 9; FOV, 180 x 240 mm<sup>2</sup>; matrix size, 192 x 256; number of slices, 49; slice thickness, 2 mm; interslice gap, 0 mm). 6) Axial 3D T<sub>2</sub>\*-weighted GRE (TR, 28 ms; TE, 20 ms; FA, 15°; FOV, 187.5 x 240 mm<sup>2</sup>; matrix size, 298 x 448; number of slices, 72; slice thickness, 1.2 mm; interslice gap, 0 mm).

The sagittal sequences were acquired as a cervico-thoracic and a thoraco-lumbar part with an overlap of at least three vertebral bodies. The axial images were planned along a line parallel to the intervertebral disc spaces.
